# Supplementary material
Source: publisher figshare collection journal article supplement (https://karger.figshare.com/ndownloader/files/21932835)
Supplement: Supplementary file 1 [file 21932835]

**Procedures**

Fetal intervention consisted of placing a fetal VAS percutaneously under ultrasound guidance. No fetal cystoscopic laser ablation of posterior urethral valves was performed. Either the Harrison Fetal Bladder Stent Set (Cook Medical Inc., Bloomington, IN, USA) (<18 weeks’ gestation) or the Rocket KCH Fetal Bladder Drain Set (Rocket Medical plc, Washington, UK) (≥18weeks’ gestation) was used15,27–29 All shunt procedures were performed in the operating room with local anesthesia (0.25% bupivacaine to maternal skin and subcutaneous tissue). Fetal anesthesia/immobilization was provided by intramuscular injection of fentanyl (15mcg/kg) and vencuronium (0.2mg/kg) to the fetus, using a 22G needle after 20 weeks’ gestation and was followed by an amnioinfusion using the same needle. Optimum placement of the shunt (with distal end in fetal bladder and proximal end in the amniotic cavity) and fetal viability were confirmed immediately and after the intervention.

**Suppl Table 1.** **Comparison of neurodevelopmental assessment between infants who received dialysis *vs*. those who did not.**

|  | **NON-DIALYSIS**  **(n=15)** | **DIALYSIS**  **(n=5)** | ***P**** |
| --- | --- | --- | --- |
| **Age at test** (months) | 21.53 ± 13.63 | 16.8 ± 13.16 | 0.5 |
| **General development**  (mean standard score ± SD ) | 101.1 ± 17.12 | 88.6 ± 17.24 | 0.27 |
| Delayed **General Development** (%) | 1/14 (7.1) | 1/3 (33.3) | 0.33 |
| **Physical development** (mean standard score ± SD) | 95.13 ± 24.98 | 59.4 ± 38.43 | 0.02 |
| Delayed **Physical development** (%) | 2/15 (13.3) | 2/5 (40) | 0.24 |
| **Adaptive development** (mean standard score ± SD ) | 104.93 ± 15.12 | 68.0 ± 35.96 | <0.01 |
| Delayed **Adaptative development** (%) | 0 | 3/5 (60) | <0.01 |
| **Social-Emotional development**  (mean standard score ± SD ) | 97.27 ± 13.93 | 80.60 ± 19.03 | 0.04 |
| Delayed **social-emotional development** (%) | 1/15 (6.7) | 2/5 (40) | 0.14 |
| **Cognitive development**  (mean standard score ± SD) | 97.13 ± 11.83 | 83.2 ± 20.8 | 0.07 |
| Delayed **Cognitive development** (%) | 0 | 1/5 (20) | 0.25 |
| **Communication**  (mean standard score ± SD) | 101.8 ± 13.92 | 91.8 ± 8.04 | 0.14 |
| Delayed **Communication development** (%) | 1/5 (6.7) | 0 | 1.0 |
| Number of cases with ≥1 delayed domains (%) | 2/15 (13.3) | 3/5 (60) | 0.07 |

Abbreviations: SD: Standard deviation. Delayed development was determined if standard score was less than 2 standard deviations, so if ≤70. Results are expressed as mean ± standard deviation or ratios and percentages. Comparisons between both groups were carried out by t-test for independent samples for quantitative data. Chi square or Fisher test were performed to compare qualitative data.
